# Supplementary material for: α-Pheromone Precursor Protein Foc4-PP1 Is Essential for the Full Virulence of Fusarium oxysporum f. sp. cubense Tropical Race 4
Source: MDPI journal article supplement (doi:10.3390/jof9030365), 2023-03-16
Supplement: s1 [file s1]

**Table S1.** Oligonucleotide primers used in this study.

| Primer       | Sequence (5'-3')                                | T <sub>m</sub><br>/ °C | Amplicon |
|--------------|-------------------------------------------------|------------------------|----------|
| Foc4-PP1-AF  | TCC <u>ggtacc</u> AAAGCATTGGCCCCACTATC          | 60                     | 993 bp   |
| Foc4-PP1-AR  | TGG <u>ctcgag</u> ATCGAGCATCTTCTAACATCTTCAGG    |                        |          |
| Foc4-PP1-BF  | TCC <u>gaattc</u> TTCGATGGGAACGAGTCTGA          | 59                     | 817 bp   |
| Foc4-PP1-BR  | TGG <u>tctaga</u> AACTGCCGATGAACTTGTGA          |                        |          |
| Foc4-PP1-F1  | GAAGCCCTTCAACTTCTCTCGT                          | 60                     | 1279 bp  |
| Foc4-PP1-F2  | TCTATCAGAGCTTGGTTGACG                           |                        |          |
| Foc4-PP1-F3  | CTACGAGCTGCTGCCTTGAT                            | 58                     | 1464 bp  |
| Foc4-PP1-F4  | CGGTCCTCAGAAGCGTGATG                            |                        |          |
| Foc4-PP1-F5  | CGGTCTTGCGATGATTATCA                            | 60                     | 1134 bp  |
| Foc4-PP1-F6  | CAAGTACCTGCGTCGTCAG                             |                        |          |
| Foc4-PP1F    | CACCAAATCGAC <u>tctaga</u> ATGAAATACTCCTTCGTTAC | 60                     | 1692 bp  |
| Foc4-PP1R    | TCACCATGGTGGC <u>ggtacc</u> TTCCTCGGACATGTCCGGC |                        |          |
| Foc4-PP1-SPF | CACCAAATCGAC <u>tctaga</u> ATGGCGCCTCCGCCGTCC   | 60                     | 1641 bp  |
| Foc4-PP1-SPR | TCACCATGGTGGC <u>ggtacc</u> TTCCTCGGACATGTCCGGC |                        |          |

Recognition sequences for restriction enzymes are underlined.

**Table S2.** Prediction of subcellular localization of Foc4-PP1.

| Protein  | PSORTII prediction |
|----------|--------------------|
| Foc4-PP1 | Nuclear, 82.6%     |
|          | Cytoplasmic, 13.0% |
|          | Cytoskeletal, 4.3% |

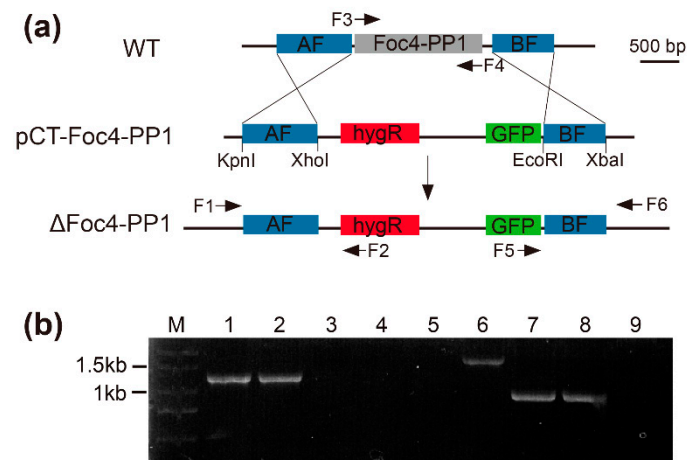

**Figure S1.** A schematic representation of targeted deletion of the Foc4-PP1 gene. **(a)** The Foc4-PP1 deletion constructs pCT-Foc4-PP1, which contains the hygromycin resistance (hygR) and green fluorescent protein (GFP) cassettes flanked by the upstream (AF) and downstream (BF) segments of the Foc4-PP1 gene, was used for the replacement of the Foc4-PP1 locus using double crossover recombination. **(b)** The identification of the Foc4-PP1 deletion using the primer sets listed in Table S1. Lanes 1, 4, and 7 were amplified by PCR with F1/F2, F3/F4, and F5/F6 primers of ΔFoc4-PP1-12, respectively. Lanes 2, 5, and 8 were amplified by PCR with F1/F2, F3/F4, and F5/F6 primers of ΔFoc4-PP1-13, respectively. Lanes 3, 6, and 9 were amplified by PCR with primers F1/F2, F3/F4, and F5/F6 of Foc TR4-14013 wild-type strains, respectively.
